# Supplementary material for: Infrared multiple photon dissociation action spectroscopy of protonated unsymmetrical dimethylhydrazine and proton-bound dimers of hydrazine and unsymmetrical dimethylhydrazine
Source: Royal Society of Chemistry journal article supplement (doi:10.1039/d1cp03781a), 2021-01-01
Supplement: d1cp03781a1.pdf [file d1cp03781a1.pdf]

**Electronic Supplementary Material**

**For**

**Infrared Multiple Photon Dissociation Spectroscopy of Protonated Unsymmetrical  
Dimethylhydrazine, Proton-bound Hydrazine Dimer and Unsymmetrical  
Dimethylhydrazine Dimer**

Christopher P. McNary,<sup>a</sup> Maria Demireva,<sup>a,†</sup> Jonathan Martens,<sup>b</sup> Giel Berden,<sup>b</sup> Jos Oomens,<sup>b,c</sup> L.  
A. Hamlow,<sup>d</sup> M. T. Rodgers,<sup>d</sup> and P.B. Armentrout\*<sup>a</sup>

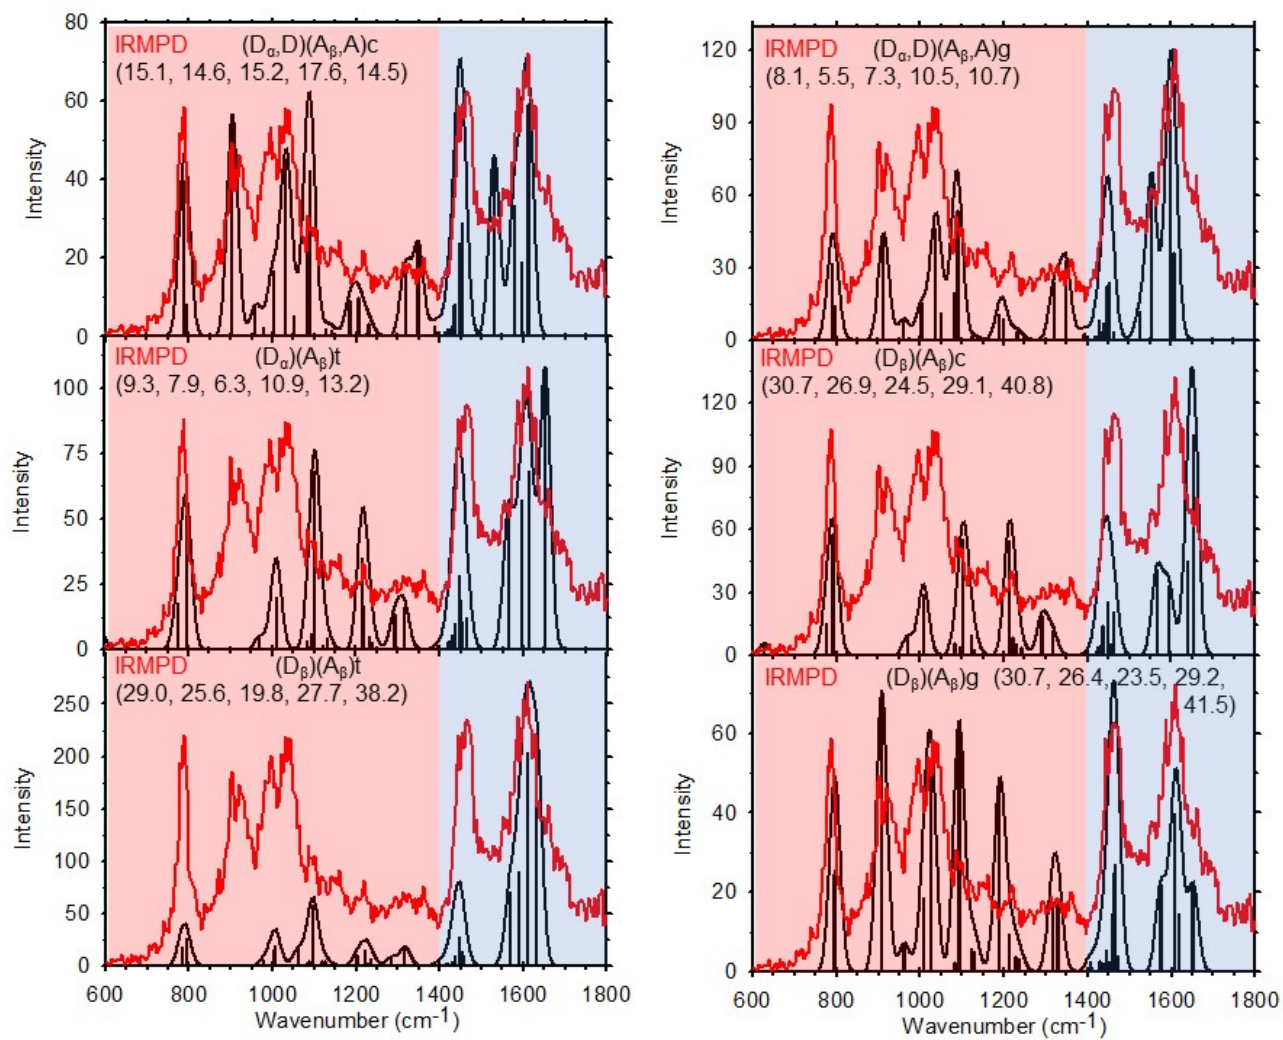

**Figure S1.** IRMPD spectrum of  $(\text{UDMH})_2\text{H}^+$  compared to the IR spectra of six higher-lying isomers of  $(\text{UDMH})_2\text{H}^+$ . Relative 298 K Gibbs energies in kJ/mol at the B3LYP, M06, mPW1PW91, PBE0, and MP2 levels are also provided. Two scaling factors were used: 0.975 for frequencies below  $1400\text{ cm}^{-1}$  (red) and 0.965 for frequencies above  $1400\text{ cm}^{-1}$  (blue). Structures are shown in Figure S2.

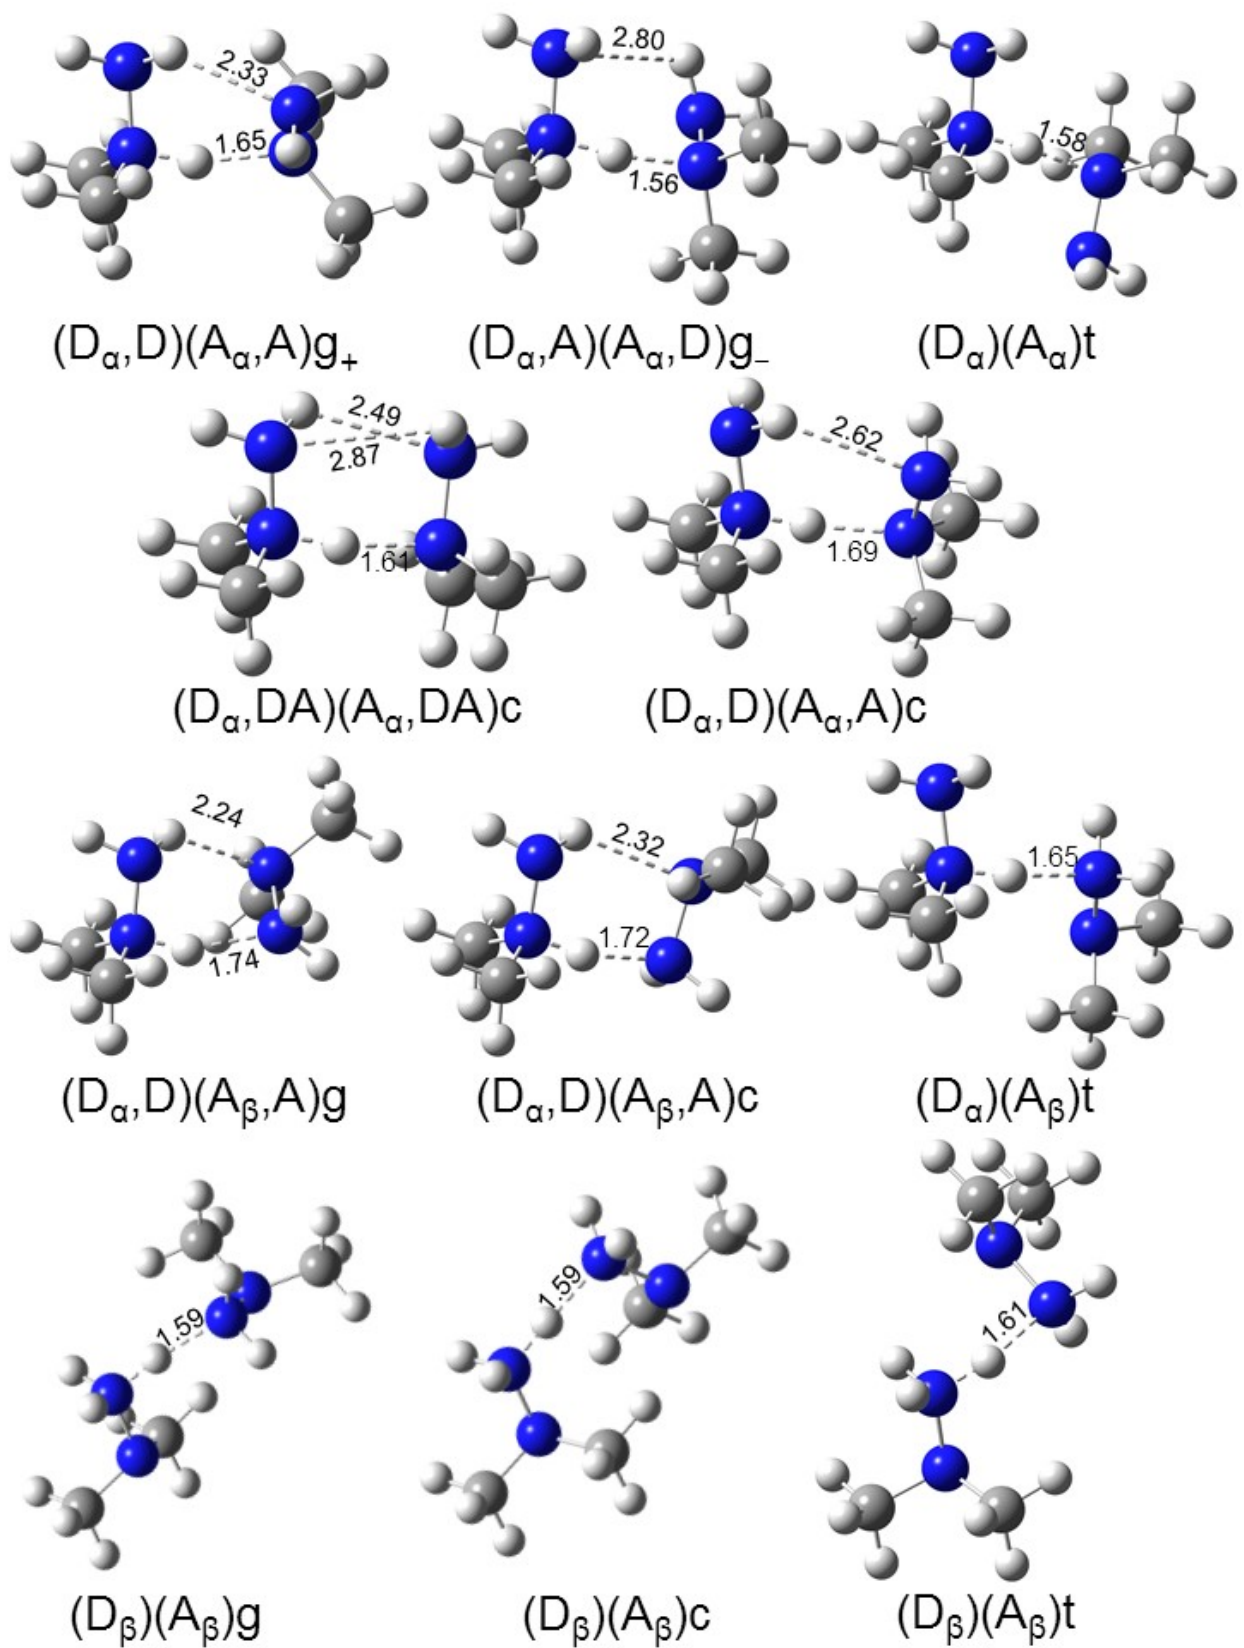

**Figure S2.** Structures of all  $(UDMH)_2H^+$  species determined at the B3LYP-GD3BJ level of theory. Hydrogen bond lengths are provided in Å.
